# Supplementary material
Source: PubMed Central journal article supplement (PMC3346347)
Supplement: supp_78.10.3744_AEM00102-12_supplemental.pdf [file supp_78.10.3744_AEM00102-12_supplemental.pdf]

1 Supplementary Material for:  
2

3 **Title:** Natural product biosynthetic gene diversity in geographically distinct soil microbiomes.

4 **Authors:** Boojala Vijay B. Reddy, Dimitris Kallifidas, Jeffrey H. Kim, Zachary Charlop-  
5 Powers, Zhiyang Feng and Sean F. Brady\*

6 **Author affiliation:** Laboratory of Genetically Encoded Small Molecules, Howard Hughes Medical  
7 Institute, The Rockefeller University, 1230 York Avenue, New York, NY 10065.

8 **\*Corresponding Author:** Sean F. Brady

9 **Contact:** Laboratory of Genetically Encoded Small Molecules

10 The Rockefeller University

11 1230 York Avenue

12 New York, NY 10065

13 Phone: 212-327-8280

14 Fax: 212-327-8281

15 Email: sbrady@rockefeller.edu  
16

17 **Running Title:** Biosynthetic gene diversity in soil microbiomes  
18  
19

1

**Supplementary Table 1:** Number of reads remaining after each 454 data processing step.

| Processing Step      | AD    |        |        | KS     |        |        | KSα    |        |        |        |
|----------------------|-------|--------|--------|--------|--------|--------|--------|--------|--------|--------|
|                      | Soil→ | AB     | AZ     | UT     | AB     | AZ     | UT     | AB     | AZ     | UT     |
| <i>454 Reads</i>     |       | 63,403 | 60,761 | 79,059 | 23,511 | 36,910 | 29,855 | 21,928 | 37,653 | 62,976 |
| <i>RDPP Trim</i>     |       | 25,631 | 33,893 | 45,046 | 12,833 | 23,460 | 18,977 | 14,864 | 27,549 | 34,837 |
| <i>No Chimes</i>     |       | 25,550 | 33,740 | 44,909 | 12,765 | 23,376 | 18,936 | 14,581 | 27,327 | 34,514 |
| <i>Non-redundant</i> |       | 21,880 | 30,190 | 38,433 | 7,233  | 14,573 | 10,840 | 6,992  | 13,640 | 21,302 |
| <i>Ref-Homologs</i>  |       | 18,943 | 26,514 | 33,155 | 6,231  | 13,097 | 9,484  | 6,511  | 12,785 | 20,094 |
| <i>Ref-Hom-Redun</i> |       | 22,597 | 30,023 | 39,559 | 11,651 | 21,780 | 17,460 | 14,072 | 26,328 | 33,057 |
| <i>97% Unique</i>    |       | 11,308 | 16,324 | 15,369 | 1,835  | 4,671  | 2,453  | 572    | 600    | 432    |

2

**Supplementary Table 2:** Number of 16S reads remaining after each 454 data processing step.

| Processing Step      | Soil→ | AB     | AZ     | UT      |
|----------------------|-------|--------|--------|---------|
| <i>454 Reads</i>     |       | 89,525 | 83,680 | 103,434 |
| <i>RDPP Trim</i>     |       | 59,521 | 53,869 | 67,077  |
| <i>No Chimes</i>     |       | 57,865 | 52,045 | 62,452  |
| <i>Non-redundant</i> |       | 23,191 | 18,930 | 22,054  |
| <i>Ref-Homologs</i>  |       | 23,169 | 18,909 | 21,999  |
| <i>NoEcoli</i>       |       | 21,239 | 15,111 | 20,875  |
| <i>Ref-Hom-Redun</i> |       | 28,081 | 28,617 | 49,637  |
| <i>97% Unique</i>    |       | 3,103  | 3,491  | 5,237   |

4

**Supplementary Table 3:** 16S sequence classification into major phyla based on RDP classifier.

| Phylum                  | AB          | AZ          | UT          |
|-------------------------|-------------|-------------|-------------|
| Unclassified            | 545         | 626         | 1024        |
| Proteobacteria          | 904         | 952         | 1421        |
| Actinobacteria          | 778         | 564         | 480         |
| Verrucomicrobia         | 153         | 649         | 934         |
| Acidobacteria           | 139         | 285         | 487         |
| Bacteroidetes           | 174         | 125         | 397         |
| Planctomycetes          | 221         | 124         | 134         |
| Gemmatimonadetes        | 117         | 128         | 248         |
| Cyanobacteria           | 31          | 0           | 20          |
| Firmicutes              | 17          | 14          | 32          |
| Chloroflexi             | 9           | 3           | 7           |
| Deinococcus-Thermus     | 5           | 0           | 2           |
| BRC1                    | 4           | 4           | 15          |
| OD1                     | 4           | 4           | 18          |
| TM7                     | 2           | 0           | 0           |
| Chlamydiae              | 1           | 1           | 2           |
| OP10                    | 0           | 1           | 4           |
| Nitrospira              | 0           | 3           | 8           |
| WS3                     | 0           | 1           | 1           |
| Bacteria_incertae_sedis | 0           | 0           | 1           |
| Archaea                 | 0           | 7           | 2           |
| <b>TOTAL</b>            | <b>3103</b> | <b>3491</b> | <b>5237</b> |

6

1 **Supplementary Table 4:** Number of clades formed when sequences from each library are  
 2 clustered at various percent identities.  
 3

| Gene or domain               | Percent identity used for clustering | Total clusters from all libraries | Number of total clusters from individual libraries |        |        | Number of clusters with sequences from each designated category |         |         |       |       |       |          |  |
|------------------------------|--------------------------------------|-----------------------------------|----------------------------------------------------|--------|--------|-----------------------------------------------------------------|---------|---------|-------|-------|-------|----------|--|
|                              |                                      |                                   | AB                                                 | AZ     | UT     | AB only                                                         | AZ only | UT only | AB&AZ | AB&UT | AZ&UT | AB&AZ&UT |  |
| <b>AD</b>                    | 97.00%                               | 42,706                            | 11,308                                             | 16,324 | 15,369 | 11,071                                                          | 16,117  | 15,146  | 74    | 149   | 133   | 16       |  |
|                              | 95.00%                               | 36,409                            | 9,992                                              | 14,304 | 12,963 | 9,484                                                           | 13,823  | 12,315  | 138   | 306   | 276   | 67       |  |
|                              | 90.00%                               | 25,947                            | 7,665                                              | 10,935 | 9,214  | 6,546                                                           | 9,898   | 7,872   | 288   | 594   | 510   | 239      |  |
|                              | 85.00%                               | 21,085                            | 6,470                                              | 9,330  | 7,533  | 5,105                                                           | 8,033   | 6,014   | 413   | 636   | 566   | 318      |  |
| <b>KS</b>                    | 97.00%                               | 8,805                             | 1,835                                              | 4,673  | 2,472  | 1,735                                                           | 4,554   | 2,349   | 44    | 48    | 67    | 8        |  |
|                              | 95.00%                               | 8,029                             | 1,711                                              | 4,264  | 2,323  | 1,562                                                           | 4,077   | 2,132   | 67    | 71    | 109   | 11       |  |
|                              | 90.00%                               | 6,790                             | 1,561                                              | 3,638  | 2,099  | 1,303                                                           | 3,268   | 1,744   | 120   | 105   | 217   | 33       |  |
|                              | 85.00%                               | 5,826                             | 1,425                                              | 3,167  | 1,927  | 1,080                                                           | 2,668   | 1,457   | 151   | 122   | 276   | 72       |  |
| <b>KS<math>\alpha</math></b> | 97.00%                               | 1,518                             | 572                                                | 610    | 454    | 472                                                             | 531     | 407     | 61    | 29    | 8     | 10       |  |
|                              | 95.00%                               | 1,148                             | 456                                                | 508    | 328    | 341                                                             | 411     | 261     | 68    | 38    | 20    | 9        |  |
|                              | 90.00%                               | 753                               | 331                                                | 384    | 237    | 191                                                             | 254     | 140     | 71    | 38    | 28    | 31       |  |
|                              | 85.00%                               | 515                               | 236                                                | 294    | 186    | 110                                                             | 163     | 89      | 56    | 22    | 27    | 48       |  |

4  
5  
6  
7  
8  
9

**Supplementary Table 5:** Phylogenetic specificities of the sequences identified in the NCBI-NT database using primer-based search.

| Kingdom/Phyla         | Genera                | AD  | KS   | KS $\alpha$ |
|-----------------------|-----------------------|-----|------|-------------|
| <b>Actinobacteria</b> | <b>Streptomyces</b>   | 63  | 894  | 60          |
|                       | <b>Rhodococcus</b>    | 32  | 0    | 1           |
|                       | <b>Amycolatopsis</b>  | 30  | 33   | 1           |
|                       | <b>Actinoplanes</b>   | 12  | 15   | 0           |
|                       | <b>Nocardia</b>       | 3   | 56   | 0           |
|                       | <b>Mycobacterium</b>  | 6   | 42   | 0           |
|                       | <b>Micromonospora</b> | 3   | 31   | 3           |
|                       | <b>Other Genera</b>   | 57  | 90   | 12          |
| <b>Proteobacteria</b> | <b>Pseudomonas</b>    | 30  | 3    | 0           |
|                       | <b>Burkholderia</b>   | 29  | 0    | 0           |
|                       | <b>Polyangium</b>     | 1   | 19   | 0           |
|                       | <b>Chondromyces</b>   | 0   | 5    | 0           |
|                       | <b>Others Genera</b>  | 17  | 2    | 0           |
| <b>Fungi</b>          | <b>Aspergillus</b>    | 0   | 12   | 0           |
|                       | <b>Other Genera</b>   | 2   | 13   | 0           |
| <b>Uncultured</b>     |                       | 49  | 88   | 2           |
| <b>Total</b>          |                       | 334 | 1303 | 79          |

10  
11  
12

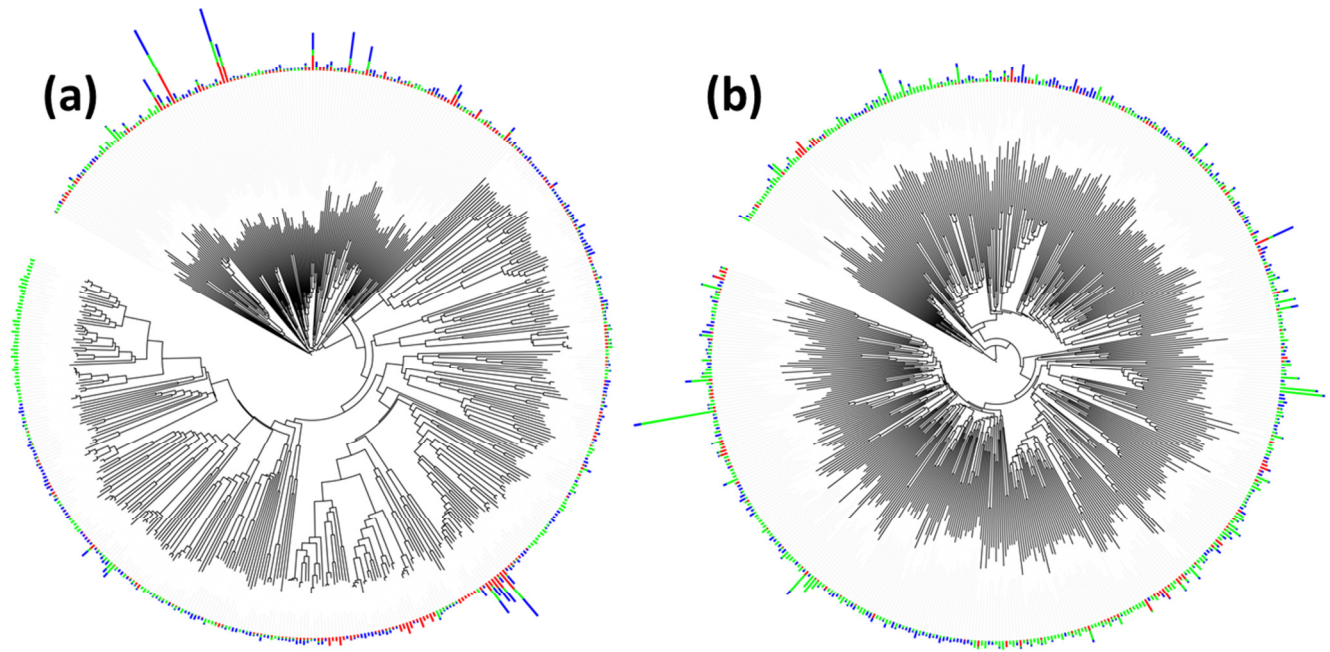

1  
2  
3  
4  
5  
6  
7  
8

**Supplementary Figure 1:** Phylogenetic trees of (a) AD and (b) KS library sequences constructed using multiple sequence alignments of representative sequences found in OTUs generated when the 97% *Unique* data sets were clustered at 85% sequence identity. The color bars show relative number of sequences from each sample library, AB (red), AZ (green) and UT (blue). Only representative sequences from the 500 most populated OTUs are shown.

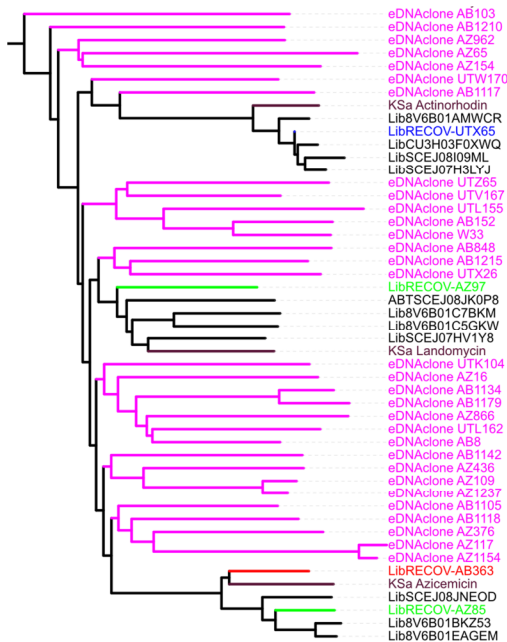

9  
10  
11  
12  
13  
14

**Supplementary Figure 2:** Phylogenetic tree of eDNA derived KSα sequences having less than 85% sequence identity to any functionally characterized sequences along with the sequences shown in Fig 5B.
